# Supplementary material
Source: PubMed Central journal article supplement (PMC7383350)
Supplement: NIHMS1599456-supplement-1599456_SuppNote.pdf [file NIHMS1599456-supplement-1599456_SuppNote.pdf]

## 1 **Supplementary Note**

### 2 **Fertility Defects in *pi6* Mutant Male Mice Are Not Due to Abnormal Litter Size or** 3 **Mating Behavior**

4 The reduced progeny from *pi6<sup>em1/em1</sup>* males does not reflect fewer pups produced in  
5 each litter: *pi6<sup>em1/em1</sup>* males sired  $5 \pm 2$  ( $n = 4$ ) pups per litter compared to  $6 \pm 2$  ( $n = 27$ )  
6 for C57BL/6 control males (Fig. 2a). Moreover, *pi6<sup>em1/em1</sup>* males regularly produced  
7 mating plugs, a sign of coitus, in cohabiting females. The observed fertility defects are  
8 specific for the loss of *pi6* piRNAs in males because *pi6<sup>+/em1</sup>* heterozygous males and  
9 *pi6<sup>em1/em1</sup>* homozygous mutant females showed no discernable phenotype.

### 10 ***pi6* Is Not Required in the Soma of the Developing Embryo**

11 *pi6* piRNAs appear to play little if any role in the soma of the developing embryo.  
12 *pi6<sup>+/em1</sup>* males mated to *pi6<sup>+/em1</sup>* females yielded progeny at the expected Mendelian and  
13 sex ratios. Moreover, the weight of *pi6<sup>em1/em1</sup>* homozygous pups ( $28.3 \pm 0.6$  g,  $n = 6$ )  
14 that developed to adulthood was indistinguishable from their C57BL/6 ( $26.9 \pm 0.3$  g,  $n =$   
15 6) or heterozygous littermates ( $28.6 \pm 0.3$  g,  $n = 8$ ; Extended Data Fig. 2b). We detected  
16 no difference in the gross appearance or behavior among these pups.

### 17 **The Majority of *pi6* Mutant Sperm Have Normal Morphology**

18 Two-to-four months after birth, both *pi6<sup>+/em1</sup>* and *pi6<sup>em1/em1</sup>* testes weighed ~15% less  
19 than wild-type C57BL/6 testes (Extended Data Fig. 2b). Nonetheless, *pi6<sup>em1/em1</sup>* and  
20 *pi6<sup>em2/em2</sup>* testes had normal gross histology, with all expected germ cell types present in  
21 seminiferous tubules and sperm clearly visible in the lumen (Fig. 2d). Despite the  
22 normal quantity of sperm, *pi6<sup>em1/em1</sup>* sperm showed signs of agglutination after 90 min  
23 incubation in vitro, compared to C57BL/6 sperm. Moreover,  $11 \pm 3\%$  ( $n = 4$ ) of *pi6<sup>em1/em1</sup>*  
24 caudal epididymal sperm had abnormal head morphology (Extended Data Fig. 2c),

25 compared to  $2 \pm 1\%$  ( $n = 5$ ) of wild-type sperm ( $p = 0.02$ ). Defects in germ cell  
26 chromosomal synapsis, triggering errors in gene expression, have been linked to  
27 abnormal sperm head shape<sup>1,2</sup>. In fact,  $22 \pm 7$  percent ( $n = 4$ ) of *pi6*<sup>em1/em1</sup> pachytene  
28 spermatocytes had unsynapsed sex chromosomes or incompletely synapsed autosomal  
29 chromosomes, compared to  $7 \pm 3$  percent ( $n = 4$ ) for C57BL/6 (Extended Data Fig. 2d  
30 and 2e).

### 31 ***pi6* Mutants Continue to Repress Transposons**

32 We used RNA-seq to measure the abundance of RNA from 1,007 transposons in four  
33 distinct purified germ cell types: pachytene spermatocytes (4C), diplotene  
34 spermatocytes (4C), secondary spermatocytes (2C), and spermatids (1C). *pi6* piRNAs  
35 compose 5.5% of all spermatocyte pachytene piRNAs (943,758 molecules per diplotene  
36 spermatocyte; Extended Data Fig. 3b), yet when *pi6* piRNAs were eliminated in  
37 *pi6*<sup>em1/em1</sup> or *pi6*<sup>em2/em2</sup> mice, we found no significant changes in steady-state RNA  
38 abundance (i.e., an increase or decrease >2-fold and FDR <0.05) for any transposon  
39 family compared to C57BL/6 germ cells (Extended Data Fig. 3c). We also note that, as  
40 in C57BL/6 wild-type,  $\gamma$ H2AX expression was confined to the sex body in pachytene  
41 spermatocytes in *pi6*<sup>em1/em1</sup> testis, indicating an absence of DNA damage (data not  
42 shown). Together with the rescue of the fertilization defects of *pi6*<sup>em1/em1</sup> sperm by ICSI,  
43 these data suggest that transposon silencing is unlikely to be the essential biological  
44 function of *pi6* piRNAs.

### 45 **Impaired Motility in *pi6* Mutant Sperm**

46 Only 10 min after sperm extraction, most *pi6*<sup>em1/em1</sup> sperm moved more slowly than  
47 C57BL/6 control sperm (Supplementary Movies 1 and 2), and as the sperm were  
48 incubated in capacitating conditions, motility of the mutant sperm continued to decline  
49 more rapidly than that of control (Supplementary Movies 3–10). By 4 h, most *pi6*<sup>em1/em1</sup>

50 sperm only moved in place and showed signs of agglutination (Supplementary Movies 8  
51 and 10).

## 52 **IVF- and ICSI-derived *pi6* Heterozygous Embryos Suffer Impaired Preimplantation** 53 **Development**

54 The low number of fertilized two-cell embryos produced in IVF using *pi6*<sup>em1/em1</sup> sperm  
55 precluded transferring the standard number of embryos to surrogate mothers. For  
56 example, in two IVF experiments using *pi6*<sup>em1/em1</sup> sperm, only 5 or 7 embryos could be  
57 transferred; the surrogate females failed to become pregnant (Fig. 5c and Extended  
58 Data Fig. 4a, Trials 1 and 2). In theory, this result might suggest a paternal role for *pi6*.  
59 A more mundane explanation is that the low number of embryos transferred reduced  
60 the yield of live fetuses, as reported previously<sup>3-5</sup>. We conducted additional experiments  
61 to distinguish between these two possibilities. Oocytes were again fertilized by IVF with  
62 *pi6*<sup>em1/em1</sup> or C57BL/6 control sperm, and two-cell embryos transferred to surrogate  
63 females, but matching the number of embryos transferred to each surrogate for the two  
64 sperm genotypes. We used two strategies. First, similar numbers of embryos derived  
65 from *pi6*<sup>em1/em1</sup> sperm and wild-type “filler” embryos derived from control sperm were  
66 transferred to separate oviducts in the same females to make up the total numbers of  
67 transferred embryos (Fig. 5c, Trials 3 and 4). Again, fewer embryos developed to term  
68 for *pi6*<sup>em1/em1</sup> (25% for Trial 3 and 4) compared to control sperm (66% for Trial 3 and 4).  
69 Second, embryos derived from *pi6*<sup>em1/em1</sup> sperm and wild-type filler embryos were mixed  
70 before transfer and then equal numbers of embryos, selected randomly, were implanted  
71 in each oviduct (Fig. 5c, Trial 5). Pups isolated by cesarean section 18.5 days after  
72 transfer were genotyped by PCR. In this experiment, only 40% of embryos derived from  
73 *pi6*<sup>em1/em1</sup> sperm developed to term, compared to 80% of wild-type filler embryos.  
74 Finally, in one experiment (Fig. 5c, Trial 6) where we obtained sufficient numbers of  
75 embryos derived from *pi6*<sup>em1/em1</sup> sperm, 10 *pi6*<sup>em1/em1</sup>-derived two-cell embryos were

76 transferred to each oviduct of the surrogate female. Just 15% of the *pi6<sup>em1/em1</sup>*-derived  
77 embryos developed to term, compared to 85% for C57BL/6. Together, these data  
78 suggest a paternal role for *pi6* piRNAs in the embryo.

79 Further support for the idea that paternal *pi6* piRNAs play a role in  
80 embryogenesis or embryonic viability comes from transfer of embryos generated by  
81 ICSI (Fig. 5d). ICSI with *pi6<sup>em1/em1</sup>* or *pi6<sup>+/em1</sup>* sperm yielded comparable normal  
82 numbers of fertilized oocytes (Fig. 3b), so no wild-type filler embryos were used; all  
83 embryos were transferred into a single oviduct of the surrogate female. In two  
84 independent experiments in which embryos generated by ICSI were transferred to  
85 surrogate mothers, only 19% of two-cell embryos derived from *pi6<sup>em1/em1</sup>* sperm heads  
86 developed to term, compared to 34% for embryos fertilized with *pi6<sup>+/em1</sup>* (Fig. 5d). Only  
87 four of seven (57%) surrogate mothers carrying embryos derived from *pi6<sup>em1/em1</sup>* sperm  
88 became pregnant. All three surrogate mothers receiving embryos derived from *pi6<sup>+/em1</sup>*  
89 sperm became pregnant (Extended Data Fig. 4b).

90 We note that the live fetuses generated using *pi6<sup>em1/em1</sup>* sperm in IVF or sperm  
91 heads in ICSI, like those produced by natural mating using *pi6<sup>em1/em1</sup>* males, showed no  
92 obvious morphological abnormalities and grew to adulthood normally when fostered by  
93 host mothers. Our data suggest a role for paternal *pi6* piRNAs in early embryogenesis  
94 or embryo viability.

## 95 ***pi6* Promoter Deletion Does Not Cause Large-Scale Changes in the Expression of** 96 **Neighboring Genes**

97 In theory, disruption of *pi6* could influence flanking gene expression, confounding  
98 transcriptome analysis. However, we find no evidence for coincidental changes in the  
99 expression of the genes flanking *pi6*. In *pi6* mutant pachytene spermatocytes, diplotene  
100 spermatocytes, and secondary spermatocytes, no gene on chromosome 6 is affected  
101 except for *pi6* itself. In spermatids, the steady-state mRNA abundance of *Atp6v1e1*,

102 which lies 7 Mb upstream of *pi6*, more than doubled in *pi6* mutants (2.1- and 2.3-fold  
103 increase in *pi6<sup>em1/em1</sup>* and *pi6<sup>em2/em2</sup>* spermatids, respectively), but expression of  
104 intervening genes was unaltered. Among the genes between *pi6* and *Atp6v1e1*, 19  
105 have mRNAs with abundance >10 molecules per cell in spermatids; none were affected  
106 by loss of *pi6* transcription. The widespread preservation of normal mRNA abundance  
107 for genes on chromosome 6 strongly argues that loss of *pi6* transcription has little or no  
108 effect on the chromatin structure of neighboring genes.

### 109 **Genes Essential for Sperm Functions Are Regulated by *pi6* piRNAs**

110 *Ceacam2* encodes CEACAM2-L, a testis-specific isoform of the carcinoembryonic  
111 antigen-related cell adhesion molecule (CEACAM) family of proteins. CEACAM2-L  
112 appears in elongated spermatids and becomes undetectable in epididymal sperm,  
113 suggesting a role as a cell surface, testicular cell adhesion factor<sup>6</sup>. *Pou2f2* encodes a  
114 transcription factor that binds DNA cooperatively with other POU domain-containing  
115 proteins<sup>7,8</sup>; *Pou2f2* is normally expressed in pre-meiotic, type-A spermatogonia, but not  
116 in gonocytes, meiotic germ cells, or post-meiotic germ cells<sup>8</sup>. The function of *Tcp11x2*,  
117 which encodes an X-linked T-complex 11 protein, is suggested by its well-characterized  
118 paralog, TCP11, a receptor for fertilization-promoting peptides that facilitate sperm  
119 capacitation<sup>9-11</sup>.

### 120 ***pi6*-Regulated Genes Regulate Related Cellular Processes**

121 Seventeen additional genes whose mRNA abundance increased in *pi6* mutants have  
122 reported functions only in somatic cells; the functions of two (*Gm595* and  
123 *2010003K11Rik*) are unknown (Supplementary Table 3). Loss-of-function phenotypes  
124 have been reported for 15 of the 24 *pi6* piRNA repressed genes. Knockout of nine  
125 genes (*Atp6v1e1*, *Rtn4*, *Ctnna2*, *Pskh1*, *Sacm1l*, *Dnajc3*, *Pouf2f2*, *Dcaf13*, *Fth1*) leads  
126 to embryonic or neonatal lethality or premature death in mice (Supplementary Table 3).

127 Two-thirds of the 24 genes encode subunits of multi-protein complexes with known  
128 functions. Overexpression of individual subunits can disrupt the function of a complex  
129 by a variety of mechanisms<sup>12</sup>. Therefore, although in vivo knockout studies have not  
130 been reported for many *pi6*-regulated genes, their functions can be inferred from that of  
131 the larger complex in which they reside. For example, loss of THOC1 or THOC5 in the  
132 TREX complex, which also contains THOC7 and ALYREF/THOC4, or of TMED2, which  
133 forms a complex with TMED9, causes embryonic lethality<sup>13–15</sup>. For 12 of the *pi6*-  
134 regulated genes, knockout mutants die before puberty, preventing assessment of a role  
135 in male fertility using existing alleles. Heterozygous mutants of one of these  
136 homozygous lethal genes, *Sacm1l*, have abnormal testis or epididymis morphology,  
137 suggesting that *Sacm1l* is important for spermatogenesis<sup>16</sup>.

138 In addition to ATP6V1E1 and CATSPERE1, eight *pi6* piRNA-regulated genes  
139 encode integral membrane proteins or regulators of membrane biogenesis or function  
140 (*Cdh9*, *Ceacam2*, *Dnajc3*, *Kctd7*, *Rtn4/Nogo*, *Sacm1l*, *Tmed9*, and *Piro-1/Gm10800*)<sup>17–</sup>  
141 <sup>26</sup>). These proteins could play a role in acrosome function. Another 8 *pi6*-regulated  
142 genes function in pathways that control or respond to intracellular ion levels. *Catspere1*,  
143 *Cdh9*, *Ceacam2*, *Prkd2*, *Pskh1*, and *Rtn4* encode proteins that regulate or respond to  
144 intracellular Ca<sup>2+</sup> concentration<sup>17,23,25,27–32</sup>. The protein products of *Atp6v1e1* and *Fth1*  
145 are required for intracellular H<sup>+</sup> and Fe<sup>3+</sup> homeostasis, respectively<sup>33–35</sup>. Thus, altered  
146 ion homeostasis may explain at least some of the defects of *pi6* mutant sperm.

147 Three *pi6*-regulated genes encode proteins that function in proteasomal protein  
148 degradation (KCTD7, DCAF13, DNAJC3). Four mediate cell-cell adhesion (CDH9,  
149 CTNNA2 [ $\alpha$ N-Catenin], CEACAM2, PRKD2). Two, ALYREF/THOC4 and THOC7, act in  
150 mRNA processing or export as components of the TREX complex, which couples  
151 mRNA transcription, splicing, and nuclear export<sup>36–38</sup>.

## 152 **Validation of Direct mRNA Targets of *pi6* piRNAs**

153 To validate targets predicted to be cleaved by *pi6* piRNAs, we used qRT-PCR to  
154 measure the abundance of full length mRNA in wild-type and *pi6<sup>em1/em1</sup>* spermatids  
155 using primers spanning the putative cleavage site (Extended Data Fig. 5 and 6a).  
156 Consistent with our RNA-seq data, all six *pi6* piRNA target mRNAs increased >3-fold in  
157 mutant spermatids ( $p \leq 0.03$ ,  $n = 3$ ; Extended Data Fig. 6a).

## 158 **Examples of mRNA Targets Cleaved by Specific *pi6* piRNAs**

159 For example, a target cleavage site in *Catspere1* mRNA exon 11 is complementary to  
160 nucleotides g2–g7 and to an additional 11 nucleotides between g8 and g21 of a *pi6*  
161 piRNA present at 744 molecules per cell in diplotene spermatocytes ( $n = 3$ ). In *pi6<sup>em1/em1</sup>*  
162 pachytene, diplotene, and secondary spermatocytes, we could no longer detect the 5'  
163 monophosphorylated 3' product of *Catspere1* mRNA cleavage, and the steady-state  
164 abundance of *Catspere1* mRNA increased 2.1- (FDR =  $5 \times 10^{-18}$ ) and 2.2- (FDR =  $6 \times$   
165  $10^{-8}$ ) times in *pi6<sup>em1/em1</sup>* and *pi6<sup>em2/em2</sup>* spermatids, respectively (Fig. 6b, Extended Data  
166 Fig. 6a, and Supplementary Table 2). We detected similar *pi6*-dependent cleavage sites  
167 in *Alyref* (one open-reading frame [ORF] cleavage site in exon 5), *Dnajc3* (one ORF  
168 cleavage site in exon 5), *Fth1* (one ORF cleavage site in exon 2; one ORF cleavage site  
169 in exon 4), *Kctd7* (two 3' UTR cleavage sites in exon 4), and *Scpep1* (one ORF  
170 cleavage site in exon 4)

## 171 ***pi6* piRNAs Initiate piRNA Biogenesis from Two Pachytene piRNA Loci on** 172 **Chromosome 10**

173 Loss of *pi6* piRNAs had no significant effect (>2 fold-change and FDR <0.05) on the  
174 abundance of mRNAs encoding piRNA pathway proteins or piRNAs derived from major  
175 piRNA-producing loci (Extended Data Fig. 3b and 6b; Supplementary Table 5). At their  
176 peak expression in wild-type diplotene spermatocytes, *pi10-qC2-545.1*

177 (*chr10:94,673,712–94,688,442*) produces  $0.15 \pm 0.01\%$  (26,192 molecules per  
178 diplotene spermatocyte,  $n = 3$ ) of pachytene piRNAs, while *pi10-qA3-143.1*  
179 (*chr10:20,310,505–20,312,312*) produces  $0.0259 \pm 0.0003\%$  (4,470 molecules per  
180 diplotene spermatocyte,  $n = 3$ ). In *pi6* mutants, *pi10-qC2-545.1* piRNAs decreased 2.5-  
181 fold in pachytene spermatocytes ( $p = 0.005$ ) and  $\geq 3$ -fold in diplotene spermatocytes,  
182 secondary spermatocytes, and spermatids ( $p = 0.0001$ ). *pi10-qA3-143.1* piRNAs  
183 declined 1.7-fold in *pi6<sup>em1/em1</sup>* diplotene spermatocytes ( $p = 0.0001$ ) and 1.5-fold in  
184 secondary spermatocytes ( $p = 0.007$ ), and spermatids ( $p = 0.0005$ ). A corresponding  
185 increase in piRNA precursor transcripts accompanied the decrease in piRNA  
186 abundance: in both *pi6<sup>em1/em1</sup>* and *pi6<sup>em2/em2</sup>* mutants, *pi10-qC2-545.1* precursors  
187 increased 2.1–3-fold in pachytene spermatocytes and diplotene spermatocytes (FDR =  
188  $3 \times 10^{-13}$  to  $6 \times 10^{-5}$ ; Fig. 7c and Supplementary Table 2). Similarly, the abundance of  
189 *pi10-qA3-143.1* precursor transcripts increased 2–2.7-fold in diplotene spermatocytes,  
190 secondary spermatocytes, and spermatids (FDR =  $4 \times 10^{-26}$  to  $2 \times 10^{-10}$ ) in the two *pi6*  
191 mutant alleles.

### 192 ***pi6* piRNAs Cleave *pi10-qC2-545.1* Precursor Transcripts**

193 When cut by a *pi6* piRNA ( $11,000 \pm 1000$  molecules per cell;  $n = 3$ ) in wild-type  
194 diplotene spermatocytes, RNA fragments derived from a cleavage site at  
195 *chr10:94,675,047–94,675,048* decreased >70-fold in *pi6<sup>em1/em1</sup>* diplotene spermatocytes  
196 ( $n = 2$ ). For *pi10-qA3-143.1*, we identified a *pi6* piRNA-dependent cleavage site that  
197 produces 5' monophosphorylated RNA in wild-type pachytene (3.3 ppm,  $n = 2$ ) and  
198 diplotene spermatocytes (4.8 ppm,  $n = 2$ ) but not in *pi6<sup>em1/em1</sup>* cells.



199 **Reciprocal Initiation of piRNA Biogenesis Is Shared Among Most Pachytene**  
200 **piRNA Loci**

201 Among the 22 loci that produce the most pachytene piRNAs in mice, 18 show such  
202 reciprocal piRNA-directed piRNA precursor cleavage. Four of these 18 loci (*7-qD2-*  
203 *11976.1*, *7-qD2-24830.1*, *pi17-qA3.3-26735.1*, and *pi17-qA3.3-27363.1*) generate  
204 piRNAs that reciprocally target the opposite arm of their shared promoter. Another four  
205 loci (*7-qD1-19431.1*, *9-qC-31469.1*, *12-qE-23911.1*, and *15-qD1-17920.1*) produce  
206 piRNAs that cleave their own precursors.

207 ***pi6* piRNAs Initiate piRNA Biogenesis from Protein-coding Genes**

208 The *Kctd7* and *Fth1* loci had been previously annotated as sources of hybrid (*pi-Kctd7*,  
209 *chr5: 130,144,861–130,155,806*) or pre-pachytene (*pi-Fth1*, *chr19:9,982,703–*  
210 *9,985,092*) piRNAs. Like many piRNA-producing mRNAs, *Kctd7* produces piRNAs  
211 ( $9,700 \pm 400$  molecules per diplotene spermatocyte,  $n = 3$ ) from its 3' UTR. In contrast,  
212 *Fth1* piRNAs ( $160 \pm 10$  molecules per diplotene spermatocyte,  $n = 3$ ) derive from the  
213 exons and 5' UTR of the mRNA. In *pi6<sup>em1/em1</sup>* diplotene spermatocytes and secondary  
214 spermatocytes, the abundance of *Kctd7* piRNAs declined 5.3-fold ( $p < 0.0001$ ,  $n = 3$ ;  
215 Fig. 7b), while the *Kctd7* and *Fth1* transcripts more than doubled in *pi6* mutants (Fig. 7c  
216 and Supplementary Table 2). Further supporting the idea that *pi6* piRNAs initiate piRNA  
217 biogenesis from these two protein-coding loci, our data identify two *pi6* piRNA-directed  
218 cleavage sites in the *Kctd7* 3' UTR and two sites in *Fth1* mRNA exons (exon 2 and exon  
219 4; Supplementary Table 4).

220

221 **Supplementary Discussion**

222 **Functional Redundancy of Pachytene piRNAs**

223 The phenotypic and molecular specificity of *pi6* mutants likely reflects a low degree of  
224 redundancy with other piRNA-producing loci. Nonetheless, other piRNA-producing loci  
225 may partially rescue loss of *pi6* piRNAs, accounting for the incomplete penetrance of  
226 the *pi6* sterility phenotype. Conversely, the lack of a phenotype for other pachytene  
227 piRNA-producing loci may simply reflect greater redundancy with their piRNA-producing  
228 peers. In this view, loss of regulation of the targets of *pi17* piRNAs may be  
229 compensated by piRNAs from other loci. Testing this hypothesis is clearly a prerequisite  
230 to explain why loss of *pi6* and not *pi17* piRNAs has an obvious biological consequence.  
231 Indeed, genetic evidence supports the hypothesis that pachytene piRNAs from other  
232 piRNA-producing loci are functionally redundant with piRNAs from *pi17* (P.-H.W, K.C.,  
233 and P.D.Z., unpublished data).

#### 234 **A Role for Pachytene piRNAs in Translational Activation**

235 Recently, a subset of pachytene piRNAs has been proposed to activate translation<sup>39</sup>. In  
236 this model, pachytene piRNAs are envisioned to bind sites in the 3' UTRs of target  
237 mRNAs through as few as 7 nt of seed complementarity (g2–g8). By comparison, our  
238 study of cleaved fragments derived from the RNA targets of *pi6* piRNAs in *pi6* mutant  
239 mice supports an siRNA-like cleavage mechanism that requires extensive base-pairing  
240 between piRNAs and target sites, most of which lie in the coding sequence of their  
241 target mRNAs. Our data suggest that the piRNA:mRNA base-pairing scheme proposed  
242 to activate translation activation is unlikely to trigger target cleavage. Although no *pi6*  
243 piRNA has been suggested to activate translation, two abundant *pi17* piRNAs were  
244 reported to activate translation of *Tbpl1* and *Cnot4*. We detect  $9,000 \pm 2,000$  molecules  
245 ( $\sim 7$  nM) of the *Tbpl1*-targeting piRNA and  $5,000 \pm 500$  molecules ( $\sim 4$  nM) of the *Cnot4*-  
246 targeting piRNA per individual diplotene spermatocyte ( $n = 3$ ). Their corresponding  
247 targets, *Tbpl1* and *Cnot4*, are present at 319 and 80 molecules per diplotene  
248 spermatocyte. Although the intracellular concentration of the piRNAs is sufficient to

249 support a high occupancy of their predicted targets in the absence of other RNAs, the  
250 overall abundance of 7mer seed (g2–g8) matches in the transcriptome of diplotene  
251 spermatocytes vastly exceeds the number of molecules of either of these two piRNAs:  
252 for the *Tbp11*-targeting piRNA, there are ~45 times more sites than piRNA (~392,800  
253 sites per diplotene spermatocyte, roughly half in 3' UTRs), and for the *Cnot4*-targeting  
254 piRNA ~114 times more sites than piRNA (607,600 molecules per diplotene  
255 spermatocyte, roughly 13% in 3' UTRs). We cannot envision a mechanism by which  
256 binding of a piRNA can promote the translation of a specific mRNA in the presence of  
257 such a vast excess of essentially identical binding sites. Moreover, the absence of a  
258 phenotype in *pi17*<sup>-/-</sup> mice suggests that translational activation of *Tbp11* and *Cnot4* by  
259 these piRNAs is dispensable for the successful completion of both spermatogenesis  
260 and spermiogenesis.  
261

## Supplementary References

1. de Boer, P., de Vries, M. & Ramos, L. A mutation study of sperm head shape and motility in the mouse: lessons for the clinic. *Andrology* **3**, 174-202 (2015).
2. Wong, E. C., Ferguson, K. A., Chow, V. & Ma, S. Sperm aneuploidy and meiotic sex chromosome configurations in an infertile XYY male. *Hum Reprod* **23**, 374-378 (2008).
3. McLaren, A. M., D. Studies on the transfer of fertilized mouse eggs to uterine foster-mothers. 394-416 (1955).
4. Johnson, L. W., Moffat, R. J., Bartol, F. F. & Pinkert, C. A. Optimization of embryo transfer protocol for mice. *Theriogenology* **46**, 1267-1276 (1996).
5. González-Jara, P. et al. Optimization of the balance between effort and yield in unilateral surgical transfer of mouse embryos. *Lab Anim* **51**, 622-628 (2017).
6. Salaheldeen, E., Kurio, H., Howida, A. & Iida, H. Molecular cloning and localization of a CEACAM2 isoform, CEACAM2-L, expressed in spermatids in mouse testis. *Mol Reprod Dev* **79**, 843-852 (2012).
7. Verrijzer, C. P., van Oosterhout, J. A. & van der Vliet, P. C. The Oct-1 POU domain mediates interactions between Oct-1 and other POU proteins. *Mol Cell Biol* **12**, 542-551 (1992).
8. Lim, J. et al. OCT2, SSX and SAGE1 reveal the phenotypic heterogeneity of spermatocytic seminoma reflecting distinct subpopulations of spermatogonia. *J Pathol* **224**, 473-483 (2011).
9. Adeoya-Osiguwa, S. A., Dudley, R. K., Hosseini, R. & Fraser, L. R. FPP modulates mammalian sperm function via TCP-11 and the adenylyl cyclase/cAMP pathway. *Mol Reprod Dev* **51**, 468-476 (1998).
10. Fraser, L. R., Hosseini, R., Hanyalogou, A., Talmor, A. & Dudley, R. K. TCP-11, the product of a mouse t-complex gene, plays a role in stimulation of capacitation

- and inhibition of the spontaneous acrosome reaction. *Mol Reprod Dev* **48**, 375-382 (1997).
11. Ma, Y. et al. Molecular characterization of the TCP11 gene which is the human homologue of the mouse gene encoding the receptor of fertilization promoting peptide. *Mol Hum Reprod* **8**, 24-31 (2002).
  12. Prelich, G. Gene overexpression: uses, mechanisms, and interpretation. *Genetics* **190**, 841-854 (2012).
  13. Jerome-Majewska, L. A., Achkar, T., Luo, L., Lupu, F. & Lacy, E. The trafficking protein Tmed2/p24beta(1) is required for morphogenesis of the mouse embryo and placenta. *Dev Biol* **341**, 154-166 (2010).
  14. Mancini, A. et al. THOC5/FMIP, an mRNA export TREX complex protein, is essential for hematopoietic primitive cell survival in vivo. *BMC Biol* **8**, 1 (2010).
  15. Wang, X., Chang, Y., Li, Y., Zhang, X. & Goodrich, D. W. Thoc1/Hpr1/p84 is essential for early embryonic development in the mouse. *Mol Cell Biol* **26**, 4362-4367 (2006).
  16. Koscielny, G. et al. The International Mouse Phenotyping Consortium Web Portal, a unified point of access for knockout mice and related phenotyping data. *Nucleic Acids Res* **42**, D802-9 (2014).
  17. Shimoyama, Y., Tsujimoto, G., Kitajima, M. & Natori, M. Identification of three human type-II classic cadherins and frequent heterophilic interactions between different subclasses of type-II classic cadherins. *Biochem J* **349**, 159-167 (2000).
  18. Ladiges, W. C. et al. Pancreatic beta-cell failure and diabetes in mice with a deletion mutation of the endoplasmic reticulum molecular chaperone gene P58IPK. *Diabetes* **54**, 1074-1081 (2005).
  19. Oh, J. et al. Progranulin and a five transmembrane domain-containing receptor-like gene are the key components in receptor activator of nuclear factor  $\kappa$ B (RANK)-

- dependent formation of multinucleated osteoclasts. *J Biol Chem* **290**, 2042-2052 (2015).
20. Dvela-Levitt, M. et al. Small molecule targets TMED9 and promotes lysosomal degradation to reverse proteinopathy. *Cell* **178**, 521-535 (2019).
  21. Nemoto, Y. et al. Functional characterization of a mammalian Sac1 and mutants exhibiting substrate-specific defects in phosphoinositide phosphatase activity. *J Biol Chem* **275**, 34293-34305 (2000).
  22. Voeltz, G. K., Prinz, W. A., Shibata, Y., Rist, J. M. & Rapoport, T. A. A class of membrane proteins shaping the tubular endoplasmic reticulum. *Cell* **124**, 573-586 (2006).
  23. Ghanem, S. S. et al. Increased glucose-induced secretion of glucagon-like peptide-1 in mice lacking the carcinoembryonic antigen-related cell adhesion molecule 2 (CEACAM2). *J Biol Chem* **291**, 980-988 (2016).
  24. Azizieh, R. et al. Progressive myoclonic epilepsy-associated gene KCTD7 is a regulator of potassium conductance in neurons. *Mol Neurobiol* **44**, 111-121 (2011).
  25. Jozsef, L. et al. Reticulon 4 is necessary for endoplasmic reticulum tubulation, STIM1-Orai1 coupling, and store-operated calcium entry. *J Biol Chem* **289**, 9380-9395 (2014).
  26. Liu, Y. et al. The Sac1 phosphoinositide phosphatase regulates Golgi membrane morphology and mitotic spindle organization in mammals. *Mol Biol Cell* **19**, 3080-3096 (2008).
  27. Chung, J. J. et al. CatSper $\zeta$  regulates the structural continuity of sperm Ca<sup>2+</sup> signaling domains and is required for normal fertility. *Elife* **6**, e23082 (2017).
  28. Shapiro, L. & Weis, W. I. Structure and biochemistry of cadherins and catenins. *Cold Spring Harb Perspect Biol* **1**, a003053 (2009).
  29. Edlund, M. & Obrink, B. Evidence for calmodulin binding to the cytoplasmic domains of two C-CAM isoforms. *FEBS Lett* **327**, 90-94 (1993).

30. Hunter, I., Sawa, H., Edlund, M. & Obrink, B. Evidence for regulated dimerization of cell-cell adhesion molecule (C-CAM) in epithelial cells. *Biochem J* **320**, 847-853 (1996).
31. Xiao, Y. et al. Deficiency of PRKD2 triggers hyperinsulinemia and metabolic disorders. *Nat Commun* **9**, 2015 (2018).
32. Brede, G., Solheim, J., Tröen, G. & Prydz, H. Characterization of PSKH1, a novel human protein serine kinase with centrosomal, golgi, and nuclear localization. *Genomics* **70**, 82-92 (2000).
33. Pietrement, C. et al. Distinct expression patterns of different subunit isoforms of the V-ATPase in the rat epididymis. *Biology of Reproduction* **74**, 185-194 (2006).
34. Sun-Wada, G. H. et al. A proton pump ATPase with testis-specific E1-subunit isoform required for acrosome acidification. *J Biol Chem* **277**, 18098-18105 (2002).
35. Ferreira, C. et al. Early embryonic lethality of H ferritin gene deletion in mice. *J Biol Chem* **275**, 3021-3024 (2000).
36. Chi, B. et al. Aly and THO are required for assembly of the human TREX complex and association of TREX components with the spliced mRNA. *Nucleic Acids Res* **41**, 1294-1306 (2013).
37. Masuda, S. et al. Recruitment of the human TREX complex to mRNA during splicing. *Genes Dev* **19**, 1512-1517 (2005).
38. Strässer, K. et al. TREX is a conserved complex coupling transcription with messenger RNA export. *Nature* **417**, 304-308 (2002).
39. Dai, P. et al. A Translation-Activating Function of MIWI/piRNA during Mouse Spermiogenesis. *Cell* **179**, 1566-1581.e16 (2019).
