# Supplementary material
Source: PubMed Central journal article supplement (PMC7383350)

Wu et al., Source Data Figure 1, related to Extended Data Figure 1

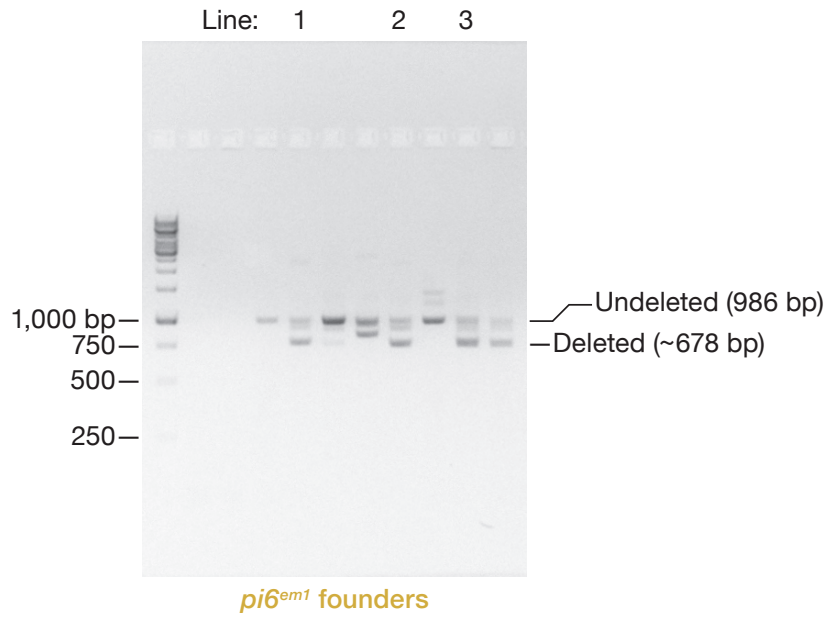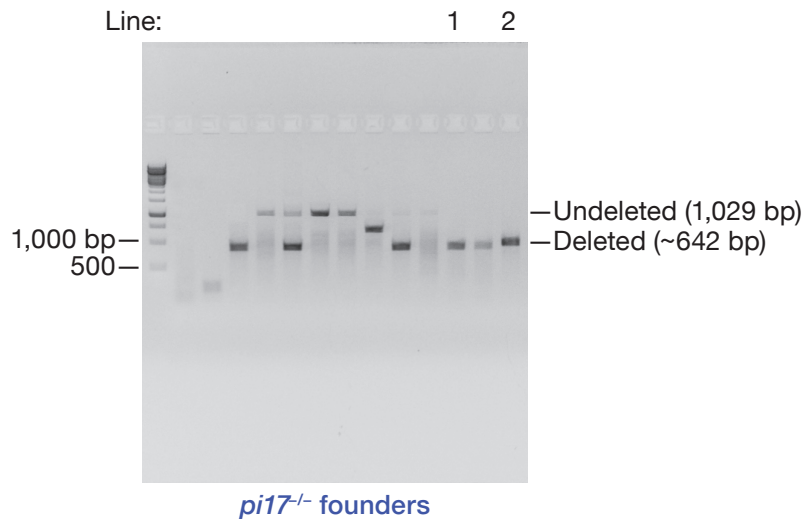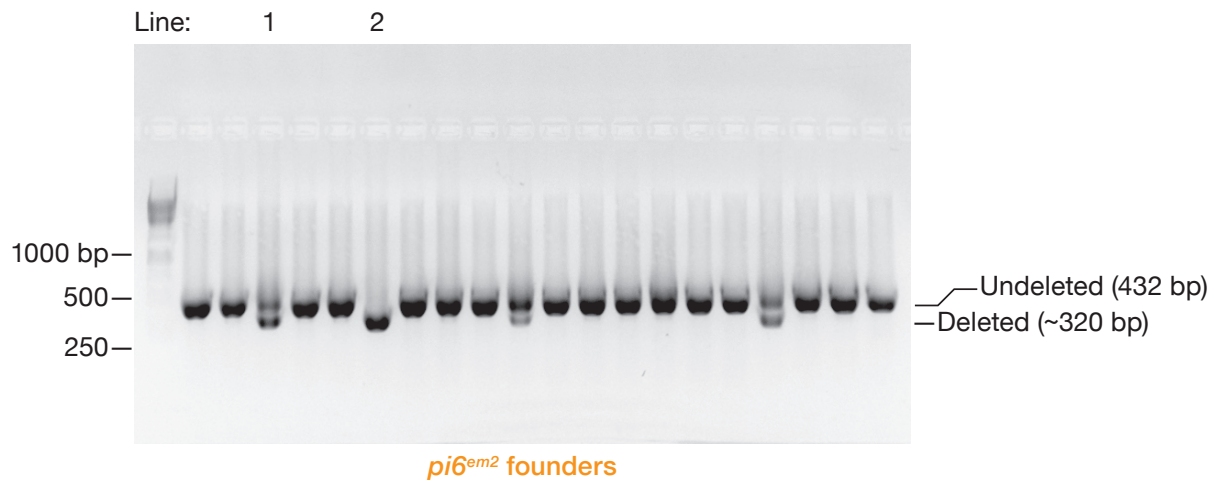

Supplement: NIHMS1599456-supplement-1599456_SourceDataFig1.pdf [file NIHMS1599456-supplement-1599456_SourceDataFig1.pdf]
